# Supplementary material for: Secreted protease PRSS35 suppresses hepatocellular carcinoma by disabling CXCL2-mediated neutrophil extracellular traps
Source: PubMed Central journal article supplement (PMC10024721; doi:10.1038/s41467-023-37227-z), 2023-03-18

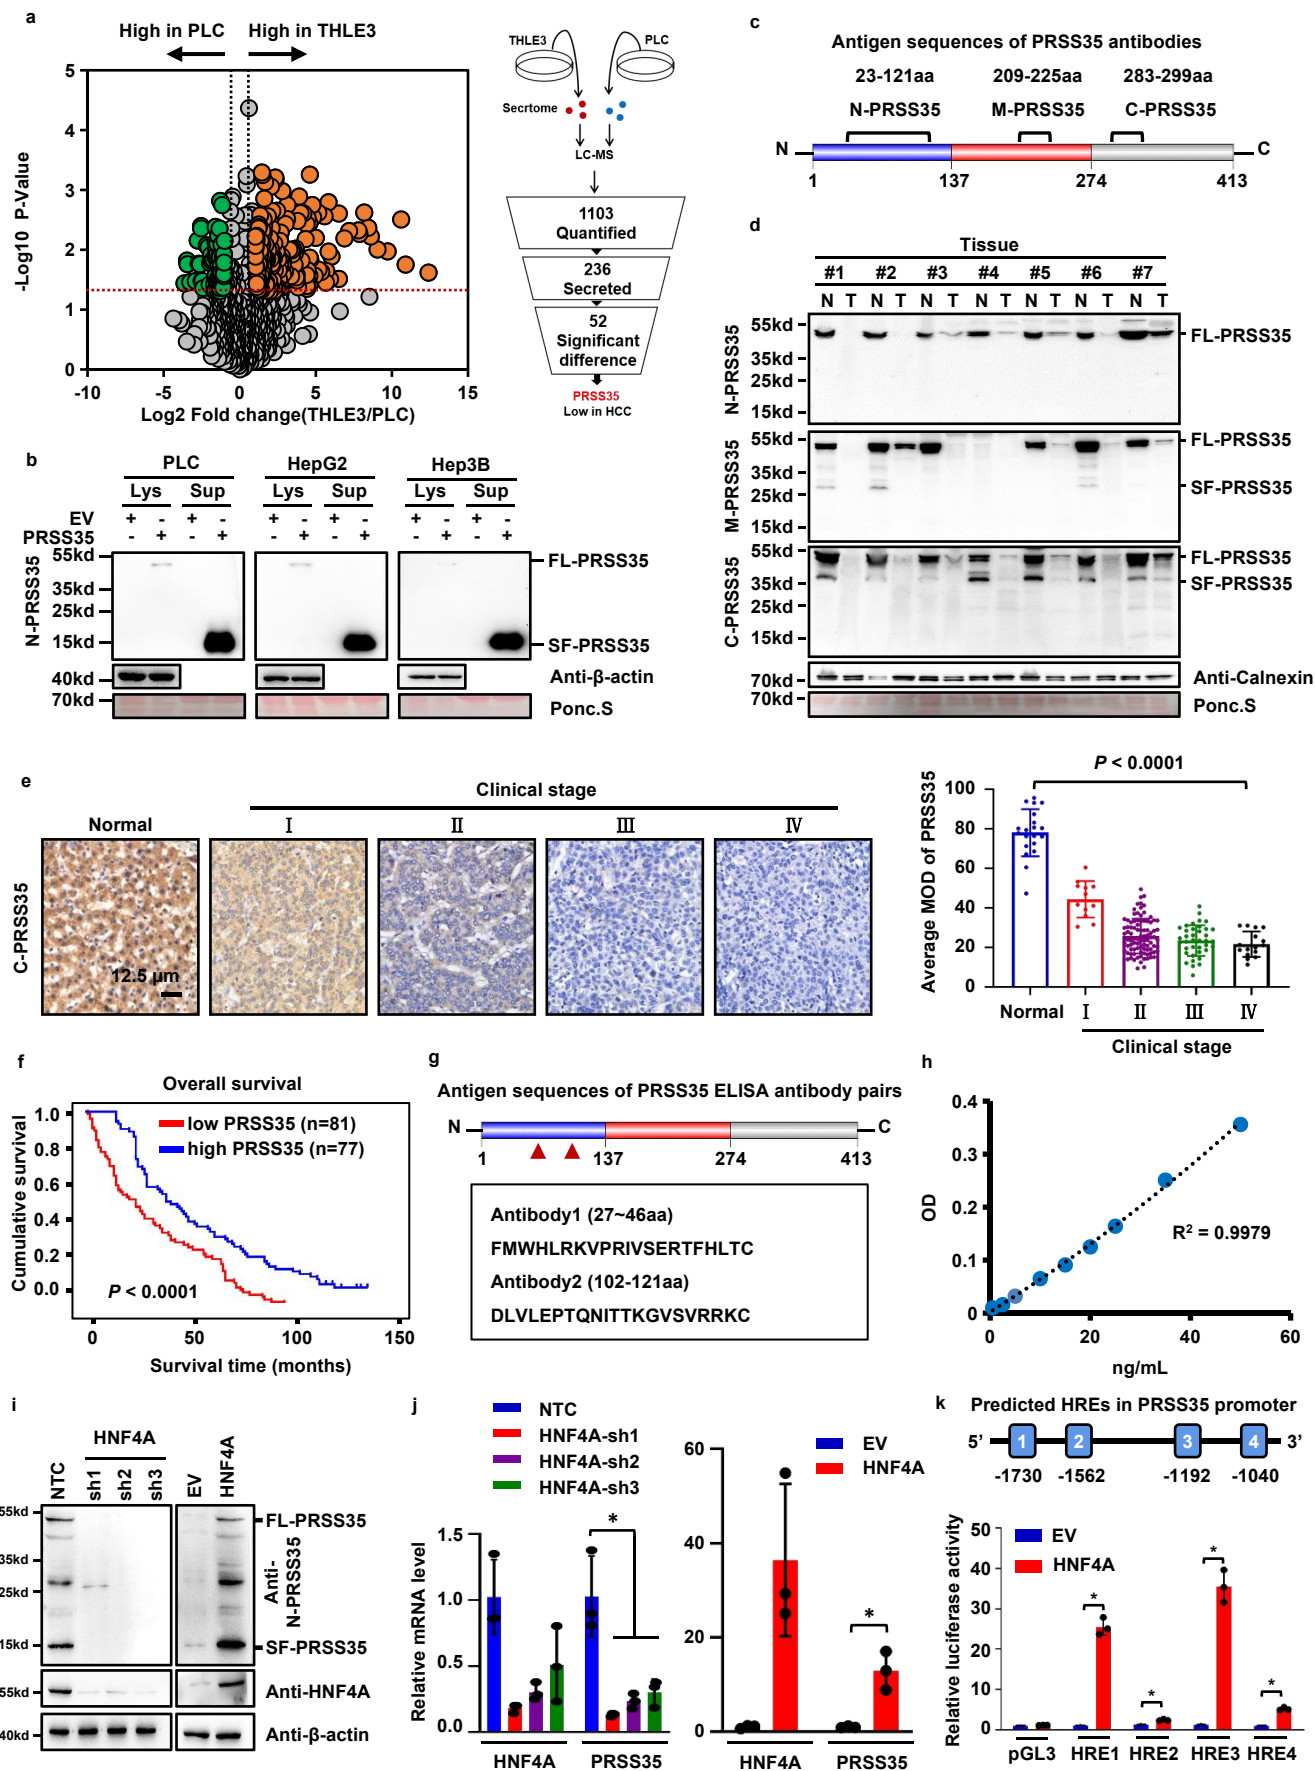

Supplementary Figure 1

## Supplementary Fig. 1. PRSS35 is a secreted protein that decreased in HCC patients

**a**, Proteomic analysis and comparison of THLE3 and PLC secretome (with non-classical secreted proteins) presented as a volcano plot. The red transverse dashed line indicates adjusted  $P$ -value of 0.05. The left black longitudinal dashed line indicates a fold-change (FC) of 0.5 and the right black longitudinal dashed line indicates a FC of 2.0. Orange dots: significantly increased proteins in THLE3 secretome ( $P < 0.05$ ,  $FC > 2.0$ ). Green dots: significantly decreased proteins in THLE3 ( $P < 0.05$ ,  $FC < 0.5$ ). The experiment was repeated three times (left panel). Diagram of the screening strategy for PRSS35 being the most significantly decreased secreted protein in HCC (right panel)

**b**, Western blot analysis of intracellular (Lys: lysate) and extracellular (Sup: supernatant) PRSS35 protein levels with anti-N-PRSS35 antibody in PLC, HepG2 and Hep3B cells stably expressing PRSS35 or EV. Ponceau staining and  $\beta$ -actin served as loading control.

**c**, Schematic diagram of the antigen sequences of three PRSS35 antibodies.

**d**, PRSS35 protein levels were determined with three different antibodies by western blot using the paired human HCC tissues (T) and adjacent non-cancerous liver tissues (N). Ponceau staining and calnexin served as loading control. FL: full length. SF: short form.

**e**, Representative IHC images of PRSS35 staining in normal liver tissues (normal) and HCC specimens of different clinical stages I-IV (healthy donors,  $n=20$ ; patients with HCC, stage I ( $n=12$ ), II ( $n=92$ ), III ( $n=38$ ) and IV ( $n=16$ )). Antibody against C-PRSS35 was used (left panel). Statistical quantification of the mean optical density (MOD) values for PRSS35 staining in IHC assay (right panel).

**f**, Kaplan-Meier curves with univariate analyses of patients with low versus high PRSS35 expression.

**g**, Schematic diagram of the antigen sequences of antibody pairs used in ELISA kit.

**h**, The standard curve of PRSS35 ELISA kit. We set ten diluted concentrations of purified PRSS35 domain1 protein fragment and determined the corresponding OD450 to calculate the linearity information.

**i**, Western blot analysis of PRSS35 protein when knocking down HNF4A with different shRNAs or overexpressing HNF4A in HepG2 cells.  $\beta$ -actin served as a loading control. FL: full length. SF: short form

**j**, Quantitative real-time PCR analysis of PRSS35 mRNA levels when knocking down HNF4A with different shRNAs or overexpressing HNF4A in HepG2 cells ( $n=3$  biologically replicates).

**k**, A diagram shows the sites and sequences of potential HNF4A responsive elements (HREs) in *PRSS35* gene (upper panel). Luciferase assays were performed to identify HREs in *PRSS35* gene (lower panel,  $n=3$  biologically replicates).

Data are presented as the mean  $\pm$  s.e.m. (e) or  $\pm$  s.d (j, k). Statistical significance was determined by two-tailed unpaired Student's t-test (a, e) or log-rank test (f, j, k). The blotting experiments were repeated at least three times with biological replicates (b, d, i). Source data are provided as a Source Data file.

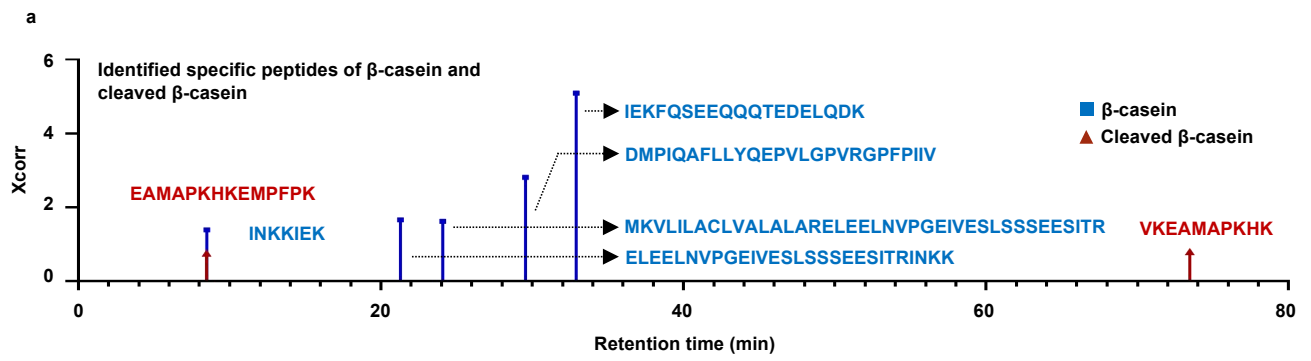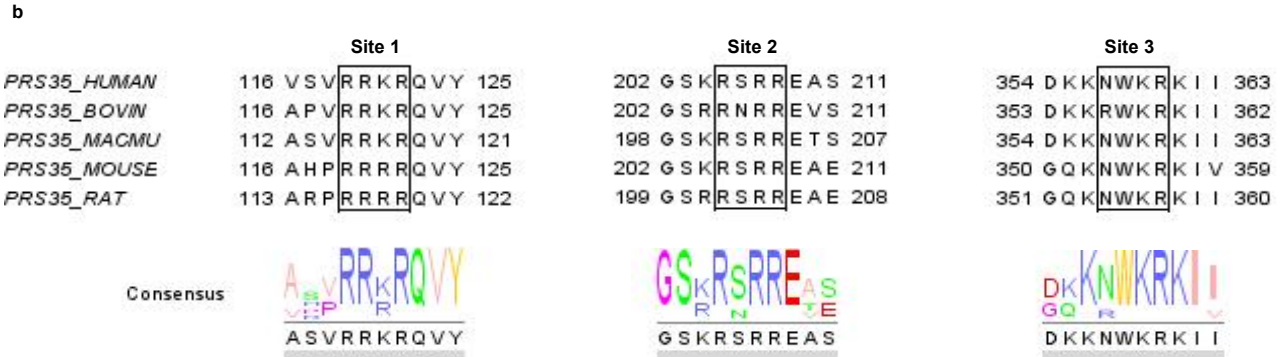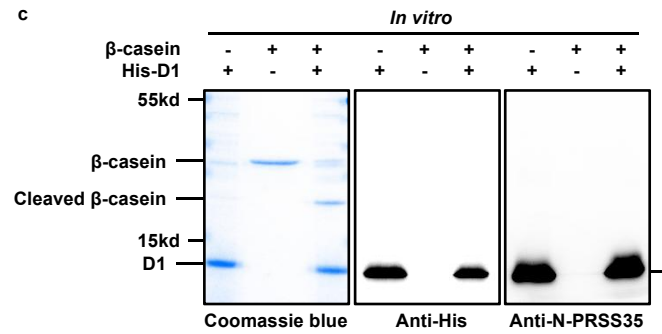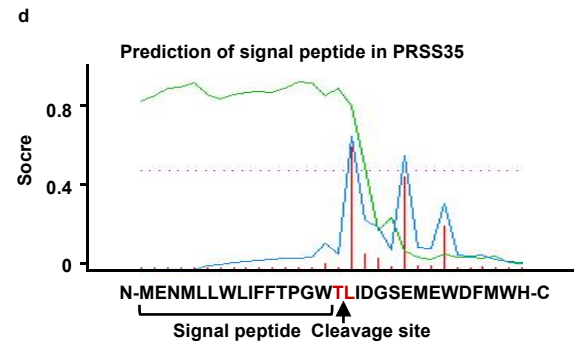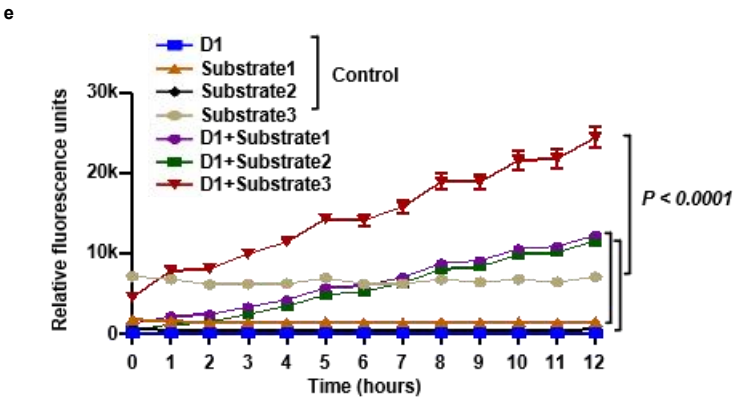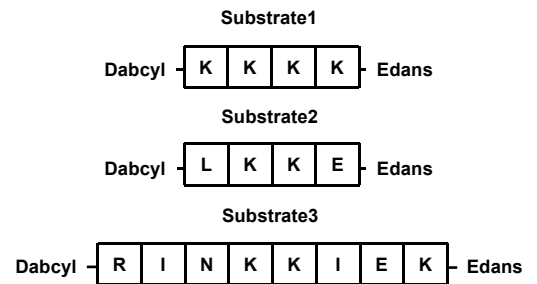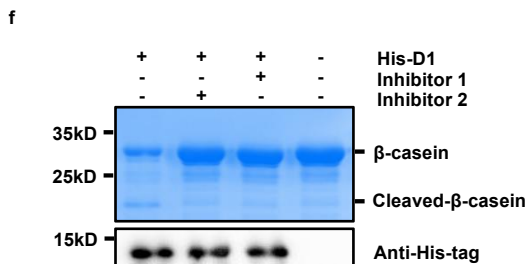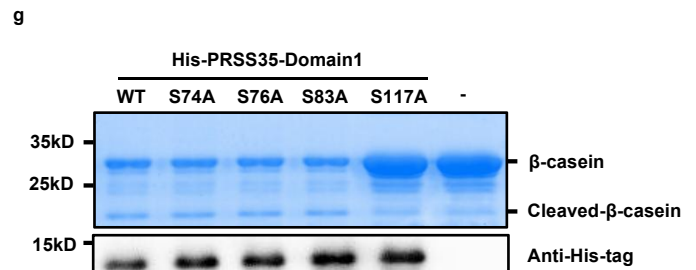

Supplementary Figure 2

## Supplementary Fig. 2. PRSS35 activated by FURIN functions as a protease

**a**, Bands from (2a) were analyzed by mass spectrometry to identify PRSS35 cleavage sites. PRSS35 cleavage of  $\beta$ -casein at K43-K44 was monitored by LC-MS through not identifying peptides containing amino acids in front of K44 in cleaved  $\beta$ -casein band, but identifying full length  $\beta$ -casein band. Identified peptides from full length  $\beta$ -casein and cleaved  $\beta$ -casein were shown.

**b**, Conserved cleavage motifs by proprotein convertases (PCs) in PRSS35 protein sequence of five species.

**c**, His-PRSS35-domain1 protein purified from *E. coli* was incubated with  $\beta$ -casein protein at 37°C overnight, followed by SDS-PAGE and coomassie brilliant blue staining (left panel). His-PRSS35-domain1 signal was determined by western blot with anti-His antibody and N-PRSS35 antibody (right panel). D1: PRSS35-domain1.

**d**, Diagram of prediction of signal peptide in PRSS35.

**e**, Fluorescent absorbance monitored over time as a measurement of active peptidase activity of PRSS35-domain1 (left panel, n=3 biologically replicates). Sequences of three fluorescent peptides (right panel).

**f**, *E. coli* purified His-D1 and  $\beta$ -casein protein were incubated with DMSO, serine protease inhibitor 1 (PMSF) or serine protease inhibitor 2 (cocktails) at 37°C overnight, followed by SDS-PAGE and coomassie brilliant blue staining. His-D1 signal was determined by western blot with anti-His antibody. D1: PRSS35 domain1, Serine protease inhibitor 2 (cocktails) included Aprotinin, Bestatin, Leupetin, Pepstatin, PMSF, E-64, and Phosphoramidon.

**g**, *E. coli* purified wild type His-D1 or mutated His-D1 protein (serine to alanine mutation) as indicated was incubated with  $\beta$ -casein protein at 37°C overnight, followed by SDS-PAGE and coomassie brilliant blue staining. wild type His-D1 and His-D1-mutation signals were determined by western blot with anti-His antibody.

Data are presented as the mean  $\pm$  s.d. (e). Statistical significance was determined by two-way ANOVA (e). The blotting experiments were repeated at least three times with biological replicates (c, f, g). Source data are provided as a Source Data file.

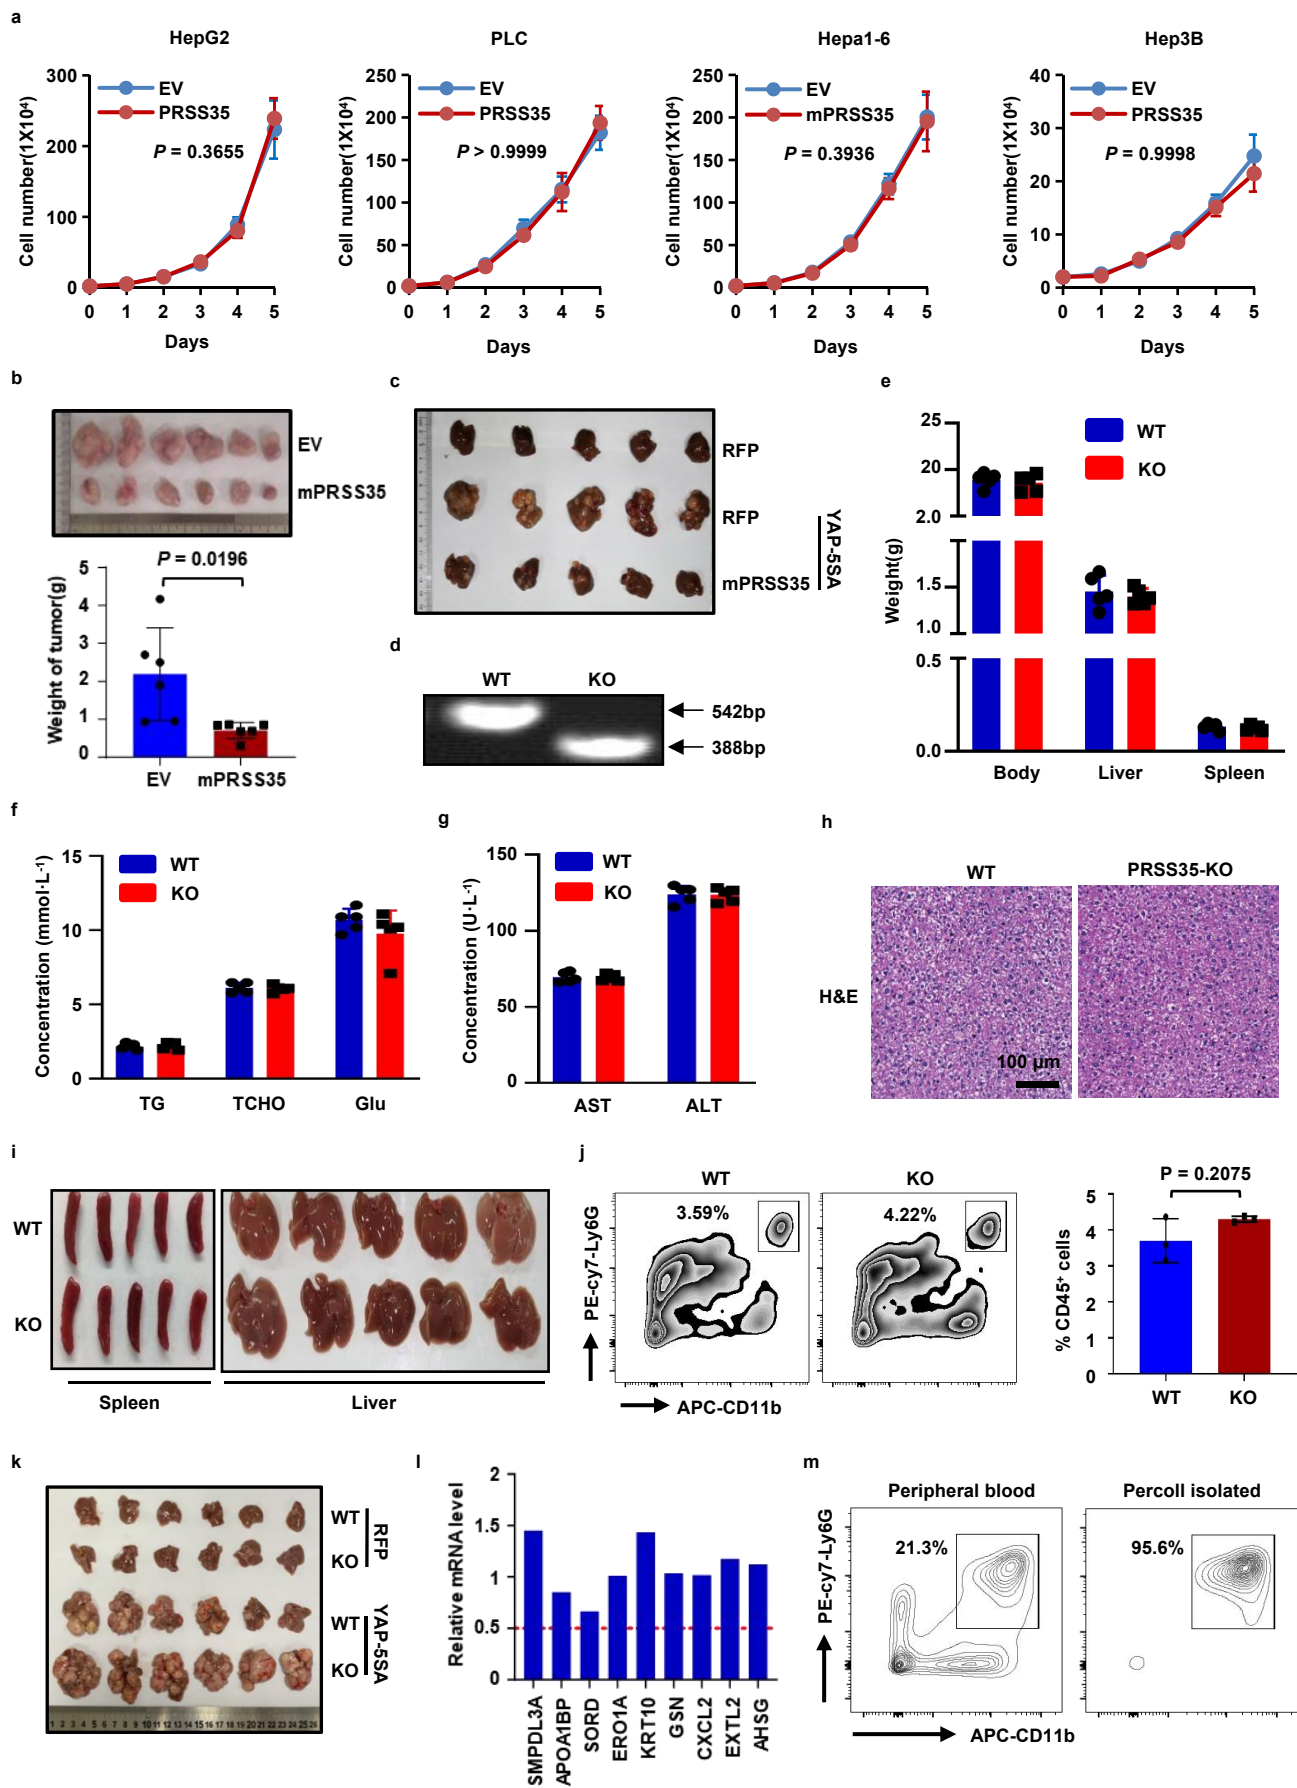

Supplementary Figure 3

**Supplementary Fig. 3. PRSS35 suppresses neutrophil migration by degrading CXCL2**

**a**, Growth curves of HepG2, PLC, Hepa1-6, and Hep3B cells stably expressing EV or PRSS35 (mPRSS35). Cell numbers were determined by trypan blue counting (n=5 biologically replicates).

**b**, Equal numbers of Hepa1-6 cells overexpressing EV or Flag-mPRSS35 were injected subcutaneously into C57BL/6J mice. Tumor weight was measured at 35 days after injection (n=6 biologically replicates).

**c**, Plasmids expressing YAP-5SA alone or YAP-5SA plus mPRSS35 together with PB transposase plasmids were delivered into ICR mice by hydrodynamic injection. YAP-5SA induced liver tumorigenesis was analyzed approximately 100 days after injection. RFP served as a control. Livers were harvested and imaged at the end of the experiment.

**d**, Geno-typing result of *mPRSS35* knockout mice. 154bp was deleted in *mPRSS35* knockout mice.

**e**, Body, liver and spleen weight of WT and *PRSS35*-KO mice (n=5 biologically replicates).

**f**, Triglyceride (TG), total cholesterol (TCHO) and glucose (Glu) in serum of WT and *PRSS35*-KO mice (n=5 biologically replicates).

**g**, Aspartic transaminase (AST) and alanine aminotransferase (ALT) concentrations in serum of WT and *PRSS35*-KO mice (n=5 biologically replicates).

**h**, Hematoxylin staining (H&E) of liver tissues from WT and *PRSS35*-KO mice.

**i**, Photograph of spleen and liver of WT and *PRSS35*-KO mice.

**j**, The neutrophil infiltration in the liver tissues of WT and *PRSS35*-KO mice (n=3 biologically replicates).

**k**, Plasmids expressing YAP-5SA or RFP together with PB transposase plasmids were delivered into *mPRSS35*-KO or WT C57BL/6J mice by hydrodynamic injection (n=6 in each group). YAP-5SA induced liver tumorigenesis was analyzed approximately 100 days after injection. Livers were harvested and imaged at the end of the experiment.

**l**, mRNA levels of the possible PRSS35-degrading substrates detected by transcriptomics.

**m**, Validation of the purity of isolated neutrophils from peripheral blood of healthy C57BL/6J mice by flow cytometry.

Data are presented as the mean  $\pm$  s.d. (a, b, e, f, g, j). Statistical significance was determined by two-way ANOVA (a, b, j). Source data are provided as a Source Data file.

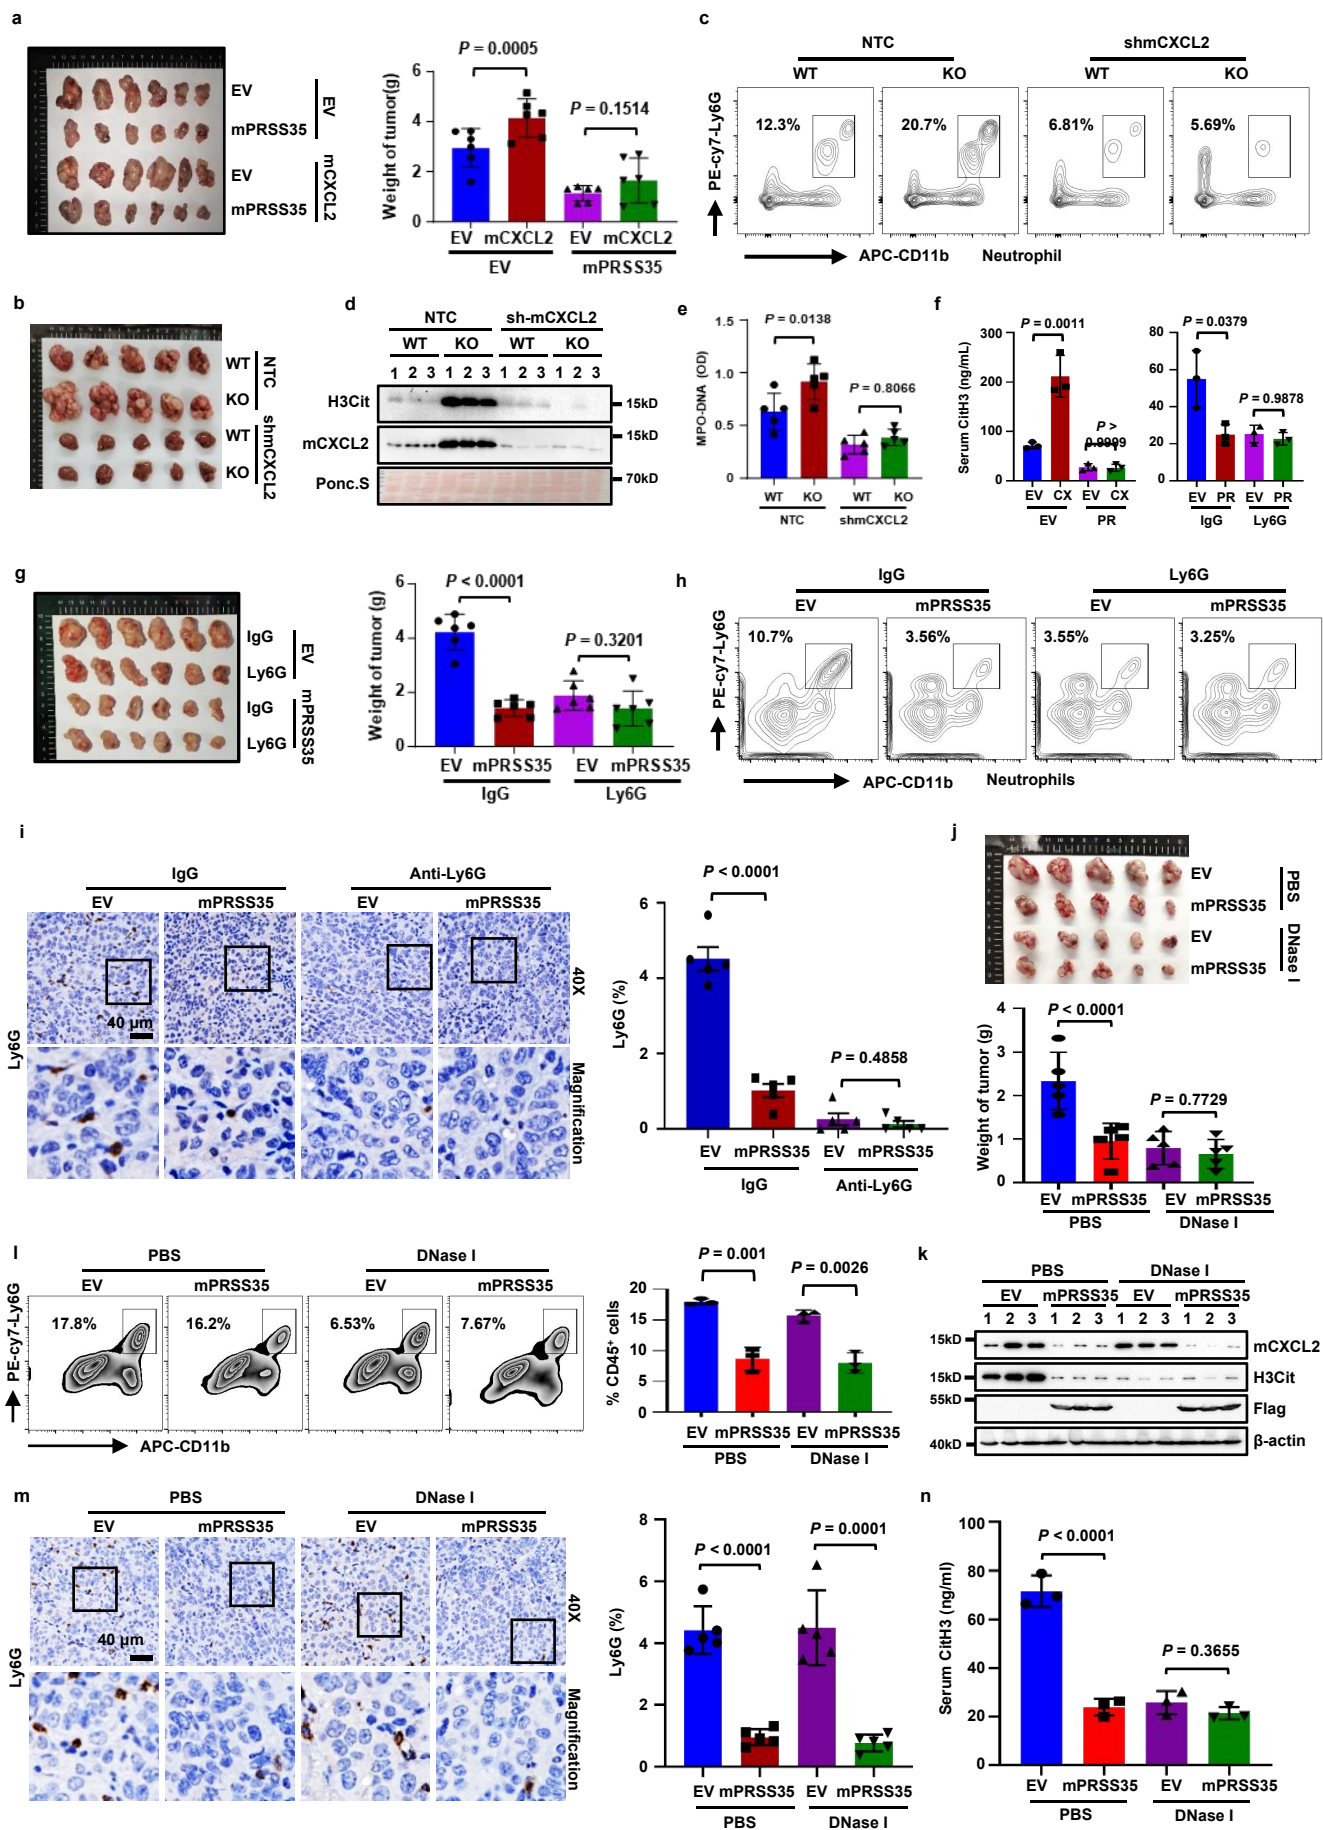

Supplementary Figure 4

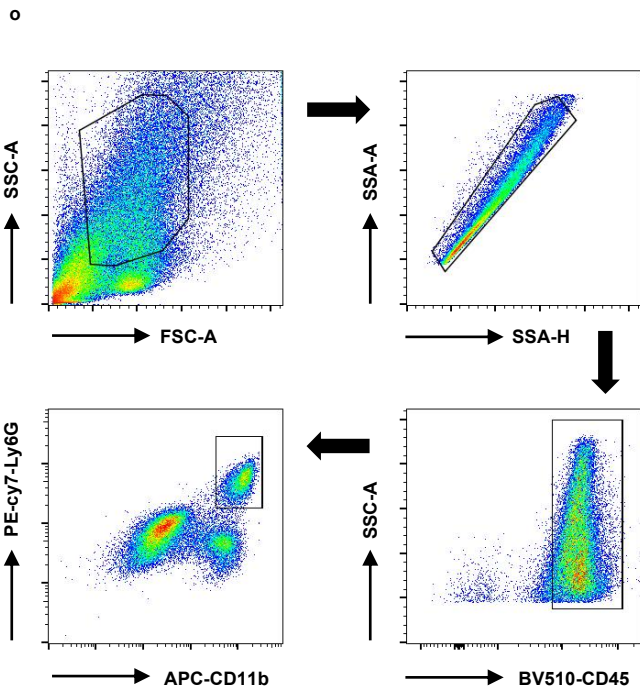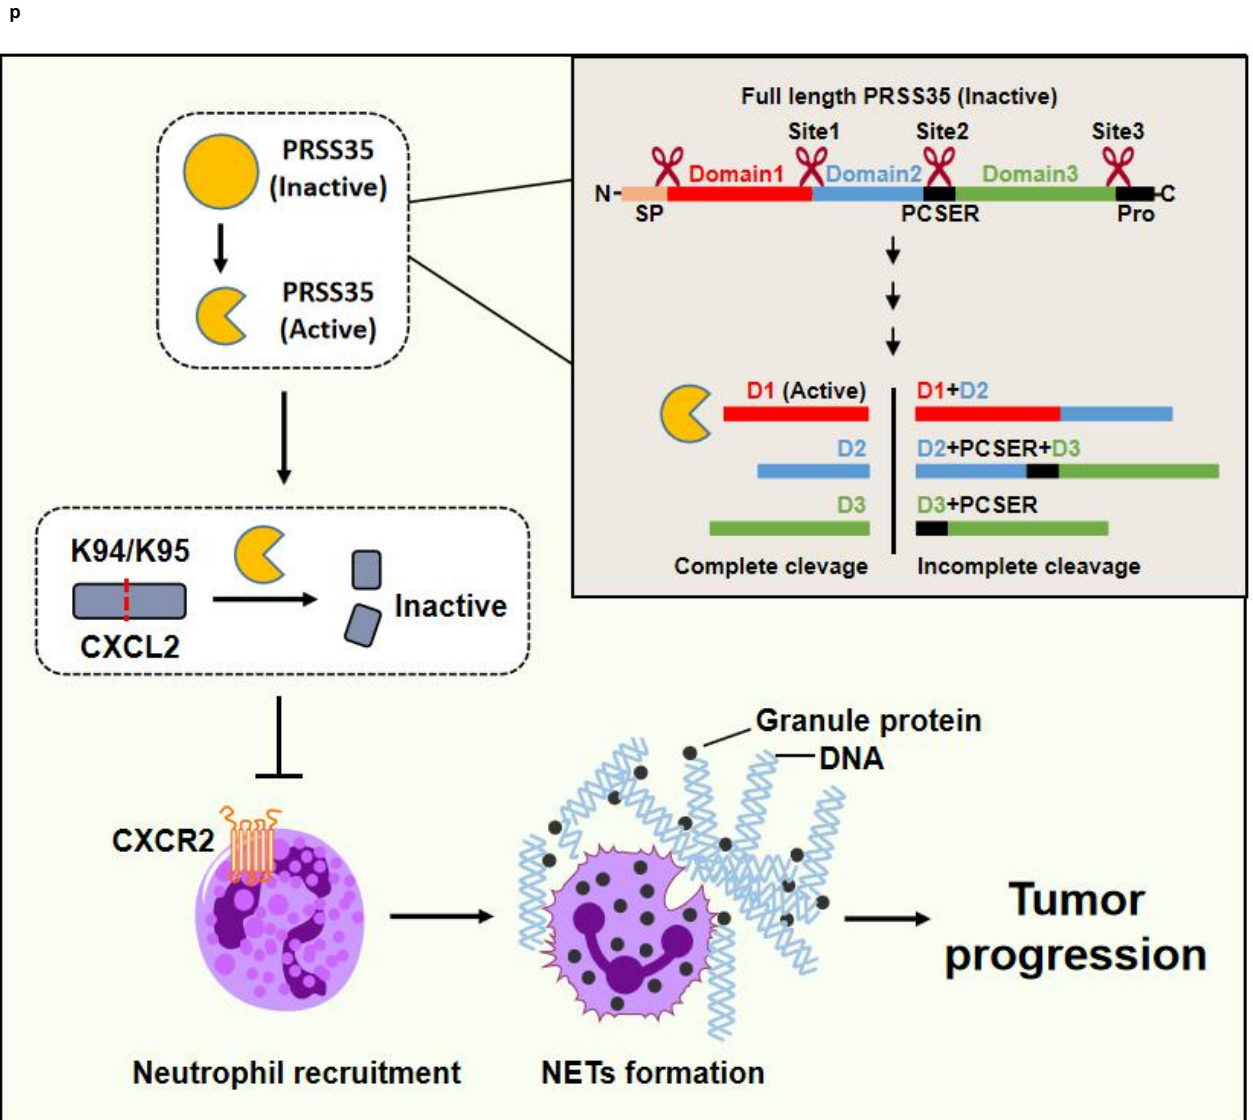



## Supplementary Fig. 4. PRSS35 inhibits HCC development by suppressing CXCL2-mediated neutrophil NETs formation

**a**, Hepa1-6 cells stably expressing EV, mCXCL2, Flag-mPRSS35, or mCXCL2 plus Flag-mPRSS35 were injected subcutaneously into C57BL/6J mice. Photograph showed tumors at the end of experiment (left panel). Tumors were extracted and weighted at the end of the experiment (right panel, n=6 biologically replicates).

**(b, c, d, e)** Plasmids expressing YAP-5SA alone or YAP-5SA plus mCXCL2 shRNAs together with plasmids expressing PB transposase were delivered into *mPRSS35*-KO or WT C57BL/6J mice by hydrodynamic injection. YAP-5SA induced liver tumorigenesis was analyzed approximately 100 days after injection. **b**, Photograph showed tumors at the end of experiment. **c**, Representative FACS analysis of neutrophil in tumors was shown. **d**, Western blot analysis of mCXCL2 and H3Cit protein levels in tumor lysates. Ponceau staining served as a loading control. **e**, Serum NETs levels in mice with HCC *in situ* were measured by MPO-DNA ELISA kit (n=5 biologically replicates).

**f**, Serum NETs levels were measured by mouse H3Cit ELISA kit using the sera from the mouse experiment in Figure 4d (left panel, n=3 biologically replicates) and Figure 4k (right panel, n=3 biologically replicates).

**(g, h, i)** Hepa1-6 cells stably expressing EV or Flag-mPRSS35 were injected subcutaneously into C57BL/6J mice, followed by intratumor and peritumoral injection of Ly6G antibody or IgG antibody nine days later. **g**, Photograph showed tumors at the end of experiment (left panel). Tumors were extracted and weighted at the end of the experiment (right panel, n=6 biologically replicates). **h**, Representative FACS analysis of neutrophil in tumors was shown. **i**, Representative IHC analysis of Ly6G expression in tumors (left panel). Statistical quantification of Ly6G-positive area/total area in IHC assay (right panel, n=5 biologically replicates).

**j**, Hepa1-6 cells stably expressing control empty vector (EV) or Flag-mPRSS35 were injected subcutaneously into C57BL/6J mice, followed by daily intraperitoneal injection of DNase I five days later. Photograph showed tumors at the end of the experiment (upper panel). Tumors were extracted and weighted at the end of the experiment (lower panel, n=5 biologically replicates).

**k**, Western blot analysis of mCXCL2, Flag-mPRSS35 and H3Cit protein levels in tumors.  $\beta$ -actin served as a loading control.

**l**, The neutrophils in tumors was detected by Flow cytometry (n=3 biologically replicates).

**m**, Representative IHC images (left panel) and quantification (right panel, n=5 biologically replicates) of neutrophils in the tumors using anti-Ly6G staining.

**n**, Serum NETs levels were measured by H3Cit ELISA kit ((n=3 biologically replicates).

**o**, FACS sequential gating strategies for FACS experiments in Figure 4c, Extended Figure 3j, m, Extended Figure 4c, h.

**p**, Working model of PRSS35 suppressing HCC progression.

Data are presented as the mean  $\pm$  s.d. (a, e, f, g, i, j, l, m, n). Statistical significance was determined by two-way ANOVA (a, e, f, g, j, l, n) or two-tailed unpaired Student's t-test (i, m). The blotting experiments were repeated at least three times with biological replicates (d, k). Source data are provided as a Source Data file.

**Supplementary Table 1. Clinicopathological characteristics of clinical samples and expression profile of PRSS35 in liver cancer**

| Characteristics          | Number of cases (%) |
|--------------------------|---------------------|
| <b>Age (years)</b>       |                     |
| ≤50                      | 95 (60.1)           |
| >50                      | 63 (39.9)           |
| <b>AFP</b>               |                     |
| ≤400ug/ul                | 97 (61.4)           |
| >400ug/ul                | 61 (38.6)           |
| <b>Gender</b>            |                     |
| Female                   | 17 (10.8)           |
| Male                     | 141 (89.2)          |
| <b>Tumor size</b>        |                     |
| ≤3 cm                    | 21 (13.3)           |
| >3 cm                    | 137 (86.7)          |
| <b>Tumor node</b>        |                     |
| ≤1                       | 120 (75.9)          |
| >1                       | 38 (24.1)           |
| <b>HBsAg</b>             |                     |
| negative                 | 38 (24.1)           |
| positive                 | 120 (75.9)          |
| <b>Cirrhosis</b>         |                     |
| Absent                   | 34 (21.5)           |
| Present                  | 124 (78.5)          |
| <b>Vascular Invasion</b> |                     |
| Absent                   | 98 (62.0)           |
| Present                  | 60 (38.0)           |
| <b>Vital status</b>      |                     |
| Alive                    | 53 (33.5)           |
| Dead                     | 105 (66.5)          |
| <b>Clinical stage</b>    |                     |
| I                        | 12 (7.6)            |
| II                       | 92 (58.2)           |
| III                      | 38 (24.1)           |
| IV                       | 16 (10.1)           |
| <b>T classification</b>  |                     |
| I                        | 12 (7.6)            |
| II                       | 92 (58.2)           |
| III                      | 38 (24.1)           |
| IV                       | 16 (10.1)           |
| <b>N classification</b>  |                     |
| N0                       | 2 (1.3)             |
| N1                       | 156 (98.7)          |
| <b>M classification</b>  |                     |
| M0                       | 1 (0.6)             |
| M1                       | 157 (99.4)          |
| <b>PRSS35</b>            |                     |
| Low expression           | 81 (51.3)           |
| High expression          | 77 (48.7)           |

Abbreviations: HBsAg, hepatitis B surface antigen; AFP, alpha fetoprotein.

**Supplementary Table 2. Correlation between PRSS35 expression and clinicopathological Characteristics of liver cancer patients**

| Variable                 | Total | PRSS35 expression |      | Chi-square test |
|--------------------------|-------|-------------------|------|-----------------|
|                          |       | low               | high | p-value         |
| <b>Age (years)</b>       |       |                   |      |                 |
| ≤50                      | 63    | 37                | 26   | 0.126           |
| >50                      | 95    | 44                | 51   |                 |
| <b>Gender</b>            |       |                   |      |                 |
| Female                   | 17    | 12                | 5    | 0.092           |
| Male                     | 141   | 69                | 72   |                 |
| <b>Tumor node</b>        |       |                   |      |                 |
| ≤1                       | 120   | 63                | 57   | 0.581           |
| >1                       | 38    | 18                | 20   |                 |
| <b>Tumor size (cm)</b>   |       |                   |      |                 |
| ≤3                       | 21    | 8                 | 13   | 0.195           |
| >3                       | 137   | 73                | 64   |                 |
| <b>Vascular Invasion</b> |       |                   |      |                 |
| Absent                   | 98    | 53                | 45   | 0.366           |
| Present                  | 60    | 28                | 32   |                 |
| <b>AFP (ug/ul)</b>       |       |                   |      |                 |
| ≤400                     | 97    | 51                | 46   | 0.678           |
| >400                     | 61    | 30                | 31   |                 |
| <b>HBsAg</b>             |       |                   |      |                 |
| negative                 | 38    | 17                | 21   | 0.356           |
| positive                 | 120   | 64                | 56   |                 |
| <b>Cirrhosis</b>         |       |                   |      |                 |
| Absent                   | 34    | 17                | 17   | 0.868           |
| Present                  | 124   | 64                | 60   |                 |
| <b>Vital status</b>      |       |                   |      |                 |
| Alive                    | 53    | 25                | 28   | 0.464           |
| Dead                     | 105   | 56                | 49   |                 |
| <b>Clinical stage</b>    |       |                   |      |                 |
| I                        | 12    | 0                 | 12   | <0.001          |
| II-IV                    | 146   | 81                | 65   |                 |

Abbreviations: HBsAg, hepatitis B surface antigen; AFP, alpha fetoprotein.

**Supplementary Table 3. Spearman analysis of the correlation between PRSS35 and clinicopathological characteristics**

| <b>Variables</b>      | <b>PRSS35 expression level</b> |                  |
|-----------------------|--------------------------------|------------------|
|                       | <b>Spearman Correlation</b>    | <b>p-Value</b>   |
| <b>Survival time</b>  | <b>0.312</b>                   | <b>&lt;0.001</b> |
| <b>Vital status</b>   | <b>-0.023</b>                  | <b>0.773</b>     |
| <b>Clinical stage</b> | <b>-0.15</b>                   | <b>0.06</b>      |
| <b>Tumor size</b>     | <b>-0.106</b>                  | <b>0.184</b>     |

**Supplementary Table 4. Oligonucleotide sequences of shRNA**

| <b>Oligonucleotide sequence of shRNAs</b> |                                                                         |
|-------------------------------------------|-------------------------------------------------------------------------|
| <b>Genes</b>                              | <b>Sequence</b>                                                         |
| <b>shFURIN-1</b>                          | <b>CCGGCCTGTCCCTCTAAAGCAATAACTCGAGTTATTGCTTTAGAGGGACA<br/>GGTTTTTG</b>  |
| <b>shFURIN-2</b>                          | <b>CCGGCCACATGACTACTCCGCAGATCTCGAGATCTGCGGAGTAGTCATG<br/>TGGTTTTTG</b>  |
| <b>shCXCL2-1 (Mouse)</b>                  | <b>CCGGGCCAAGGGTTGACTTCAAGAACTCGAGTTCTTGAAGTCAACCCTT<br/>GGTTTTTG</b>   |
| <b>shCXCL2-2 (Mouse)</b>                  | <b>CCGGCCACTCTCAAGGGCGGTCAAACCTCGAGTTTGACCGCCCTTGAGAG<br/>TGGTTTTTG</b> |
| <b>shCXCL2-3 (Mouse)</b>                  | <b>CCGGACTGAACAAAGGCAAGGCTAACTCGAGTTAGCCTTGCCTTTGTTC<br/>AGTTTTTTG</b>  |

**Supplementary Table 5. The information of serum samples from 149 liver cancer patients and 73 healthy donors**

| Patient | Gender | Age (years) | Tumor | Patient | Gender | Age (years) | Tumor | Patient | Gender | Age (years) | Tumor |
|---------|--------|-------------|-------|---------|--------|-------------|-------|---------|--------|-------------|-------|
| 1       | female | 67          | HCC   | 51      | male   | 63          | HCC   | 101     | male   | 56          | HCC   |
| 2       | female | 82          | HCC   | 52      | male   | 26          | HCC   | 102     | male   | 75          | HCC   |
| 3       | male   | 38          | HCC   | 53      | male   | 41          | HCC   | 103     | female | 44          | HCC   |
| 4       | male   | 45          | HCC   | 54      | male   | 63          | HCC   | 104     | female | 45          | HCC   |
| 5       | male   | 48          | HCC   | 55      | male   | 56          | HCC   | 105     | female | 65          | HCC   |
| 6       | female | 52          | HCC   | 56      | male   | 54          | HCC   | 106     | female | 52          | HCC   |
| 7       | male   | 62          | HCC   | 57      | male   | 66          | HCC   | 107     | male   | 54          | HCC   |
| 8       | male   | 71          | HCC   | 58      | male   | 74          | HCC   | 108     | male   | 78          | HCC   |
| 9       | male   | 40          | HCC   | 59      | male   | 58          | HCC   | 109     | male   | 55          | HCC   |
| 10      | male   | 74          | HCC   | 60      | male   | 64          | HCC   | 110     | female | 41          | HCC   |
| 11      | male   | 48          | HCC   | 61      | male   | 47          | HCC   | 111     | female | 35          | HCC   |
| 12      | female | 53          | HCC   | 62      | male   | 51          | HCC   | 112     | female | 71          | HCC   |
| 13      | male   | 55          | HCC   | 63      | male   | 43          | HCC   | 113     | female | 63          | HCC   |
| 14      | male   | 71          | HCC   | 64      | female | 63          | HCC   | 114     | male   | 62          | HCC   |
| 15      | male   | 56          | HCC   | 65      | male   | 76          | HCC   | 115     | male   | 59          | HCC   |
| 16      | male   | 45          | HCC   | 66      | male   | 41          | HCC   | 116     | female | 57          | HCC   |
| 17      | male   | 67          | HCC   | 67      | male   | 58          | HCC   | 117     | male   | 23          | HCC   |
| 18      | female | 69          | HCC   | 68      | female | 50          | HCC   | 118     | male   | 49          | HCC   |
| 19      | female | 70          | HCC   | 69      | male   | 56          | HCC   | 119     | male   | 46          | HCC   |
| 20      | male   | 55          | HCC   | 70      | male   | 67          | HCC   | 120     | male   | 54          | HCC   |
| 21      | female | 46          | HCC   | 71      | male   | 70          | HCC   | 121     | male   | 46          | HCC   |
| 22      | male   | 68          | HCC   | 72      | male   | 64          | HCC   | 122     | male   | 56          | HCC   |
| 23      | male   | 70          | HCC   | 73      | male   | 49          | HCC   | 123     | female | 54          | HCC   |
| 24      | male   | 54          | HCC   | 74      | male   | 85          | HCC   | 124     | male   | 46          | HCC   |
| 25      | male   | 73          | HCC   | 75      | male   | 67          | HCC   | 125     | female | 50          | HCC   |
| 26      | male   | 70          | HCC   | 76      | male   | 63          | HCC   | 126     | female | 57          | HCC   |
| 27      | female | 61          | HCC   | 77      | male   | 71          | HCC   | 127     | female | 46          | HCC   |
| 28      | female | 58          | HCC   | 78      | male   | 76          | HCC   | 128     | female | 70          | HCC   |
| 29      | female | 56          | HCC   | 79      | male   | 64          | HCC   | 129     | male   | 48          | HCC   |
| 30      | male   | 59          | HCC   | 80      | male   | 61          | HCC   | 130     | female | 66          | HCC   |
| 31      | male   | 53          | HCC   | 81      | male   | 47          | HCC   | 131     | male   | 66          | HCC   |
| 32      | male   | 73          | HCC   | 82      | female | 72          | HCC   | 132     | male   | 48          | HCC   |
| 33      | female | 41          | HCC   | 83      | female | 74          | HCC   | 133     | male   | 55          | HCC   |
| 34      | female | 61          | HCC   | 84      | male   | 66          | HCC   | 134     | female | 72          | HCC   |
| 35      | male   | 51          | HCC   | 85      | female | 54          | HCC   | 135     | male   | 54          | HCC   |
| 36      | male   | 55          | HCC   | 86      | male   | 64          | HCC   | 136     | male   | 68          | HCC   |
| 37      | female | 47          | HCC   | 87      | male   | 70          | HCC   | 137     | female | 62          | HCC   |
| 38      | male   | 86          | HCC   | 88      | male   | 82          | HCC   | 138     | male   | 62          | HCC   |
| 39      | male   | 48          | HCC   | 89      | male   | 61          | HCC   | 139     | female | 73          | HCC   |
| 40      | female | 54          | HCC   | 90      | female | 65          | HCC   | 140     | male   | 62          | HCC   |
| 41      | male   | 76          | HCC   | 91      | male   | 62          | HCC   | 141     | male   | 54          | HCC   |
| 42      | female | 66          | HCC   | 92      | female | 68          | HCC   | 142     | male   | 50          | HCC   |
| 43      | male   | 55          | HCC   | 93      | male   | 45          | HCC   | 143     | male   | 49          | HCC   |
| 44      | male   | 54          | HCC   | 94      | female | 59          | HCC   | 144     | male   | 65          | HCC   |
| 45      | male   | 60          | HCC   | 95      | male   | 82          | HCC   | 145     | male   | 56          | HCC   |
| 46      | male   | 59          | HCC   | 96      | male   | 45          | HCC   | 146     | female | 56          | HCC   |
| 47      | male   | 42          | HCC   | 97      | male   | 56          | HCC   | 147     | male   | 63          | HCC   |

|    |      |    |     |
|----|------|----|-----|
| 48 | male | 66 | HCC |
| 49 | male | 47 | HCC |
| 50 | male | 62 | HCC |

|     |        |    |     |
|-----|--------|----|-----|
| 98  | male   | 61 | HCC |
| 99  | male   | 66 | HCC |
| 100 | female | 78 | HCC |

|     |        |    |     |
|-----|--------|----|-----|
| 148 | female | 35 | HCC |
| 149 | female | 66 | HCC |

### Supplementary Table 5 continued

| Healthy donor | Gender | Age(years) | Healthy donor | Gender | Age(years) |
|---------------|--------|------------|---------------|--------|------------|
| 1             | male   | 47         | 38            | male   | 35         |
| 2             | female | 31         | 39            | male   | 42         |
| 3             | female | 31         | 40            | male   | 37         |
| 4             | male   | 41         | 41            | male   | 36         |
| 5             | female | 27         | 42            | male   | 38         |
| 6             | female | 29         | 43            | female | 34         |
| 7             | male   | 28         | 44            | female | 48         |
| 8             | female | 29         | 45            | male   | 31         |
| 9             | female | 49         | 46            | male   | 43         |
| 10            | female | 45         | 47            | female | 54         |
| 11            | male   | 32         | 48            | male   | 45         |
| 12            | female | 47         | 49            | female | 50         |
| 13            | male   | 47         | 50            | male   | 58         |
| 14            | male   | 29         | 51            | female | 30         |
| 15            | female | 19         | 52            | female | 50         |
| 16            | female | 32         | 53            | male   | 51         |
| 17            | female | 56         | 54            | female | 51         |
| 18            | female | 52         | 55            | female | 43         |
| 19            | male   | 27         | 56            | male   | 53         |
| 20            | male   | 28         | 57            | female | 38         |
| 21            | female | 42         | 58            | female | 24         |
| 22            | female | 38         | 59            | male   | 61         |
| 23            | male   | 36         | 60            | male   | 66         |
| 24            | female | 35         | 61            | female | 34         |
| 25            | female | 38         | 62            | male   | 71         |
| 26            | female | 47         | 63            | male   | 66         |
| 27            | male   | 26         | 64            | male   | 35         |
| 28            | male   | 86         | 65            | male   | 84         |
| 29            | male   | 35         | 66            | male   | 48         |
| 30            | male   | 39         | 67            | female | 37         |
| 31            | female | 42         | 68            | male   | 53         |
| 32            | female | 47         | 69            | male   | 24         |
| 33            | male   | 36         | 70            | male   | 33         |
| 34            | male   | 64         | 71            | male   | 32         |
| 35            | male   | 44         | 72            | female | 31         |
| 36            | male   | 37         | 73            | female | 37         |
| 37            | female | 55         |               |        |            |

# Source data-Supplementary Figure 1

**b**

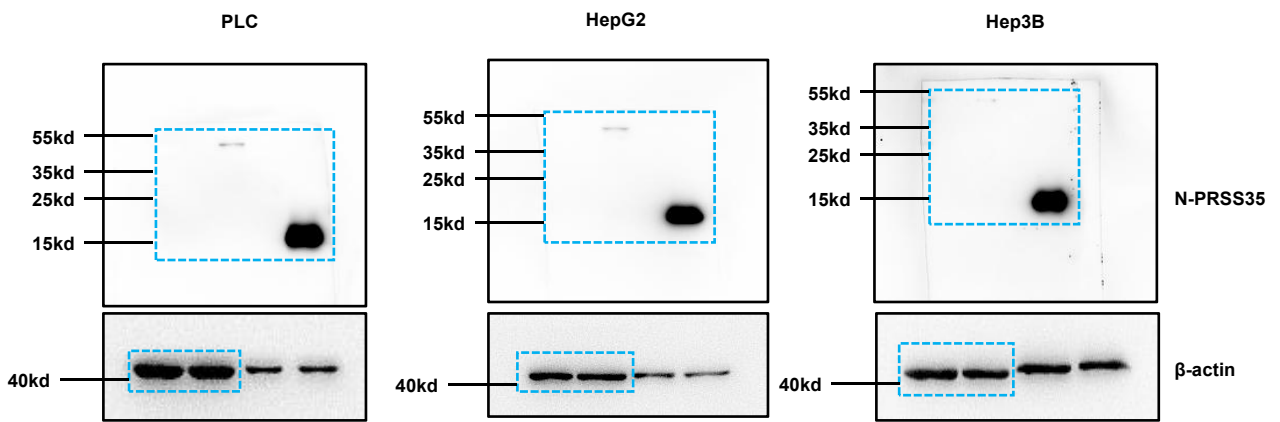

**d**

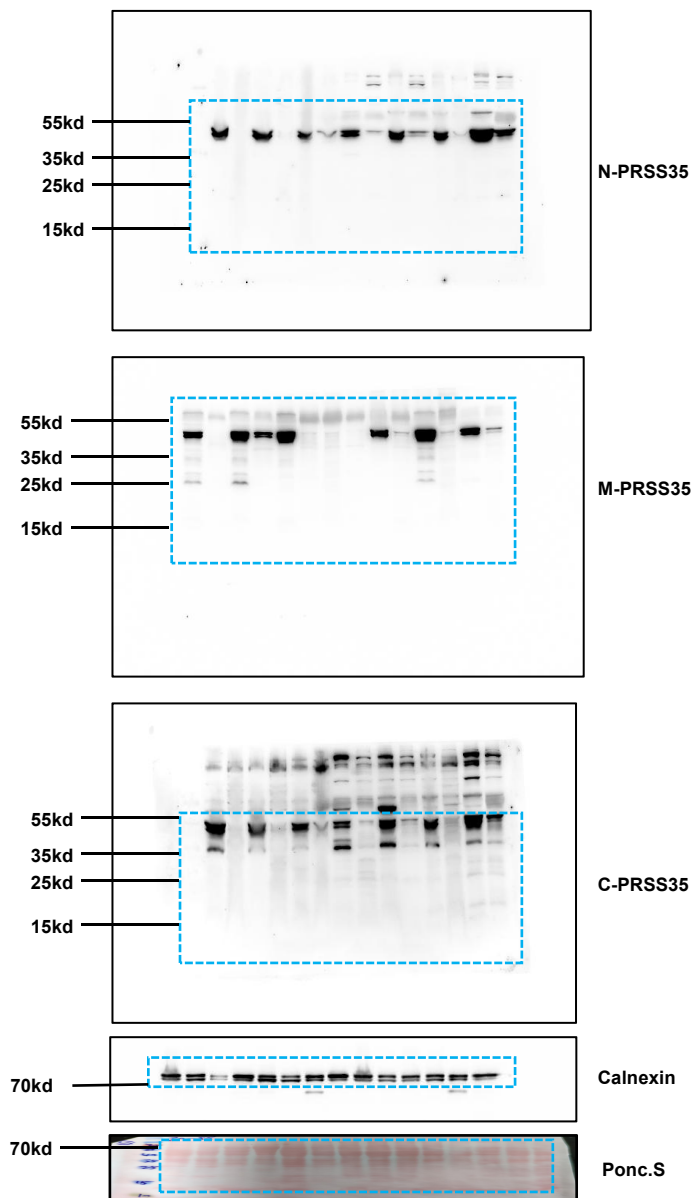

**i**

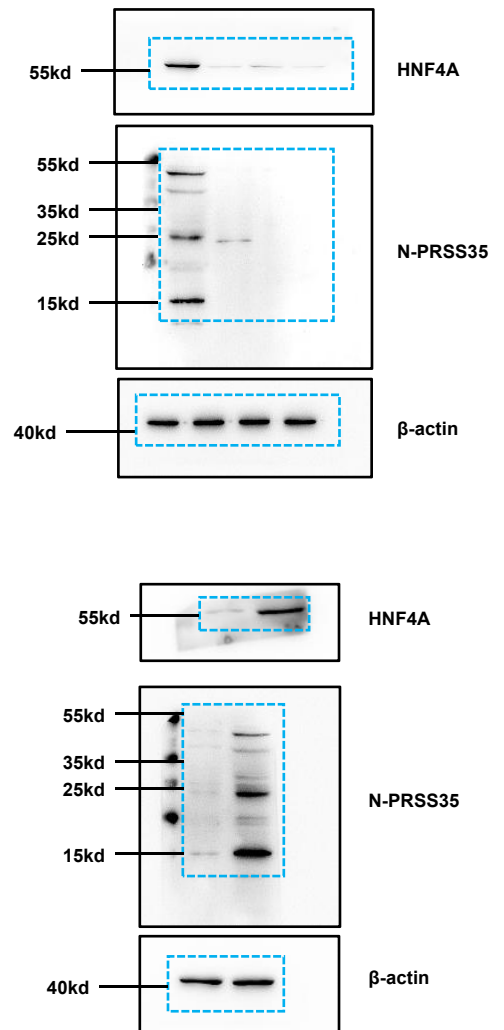



## Source data-Supplementary Figure 2

**C**

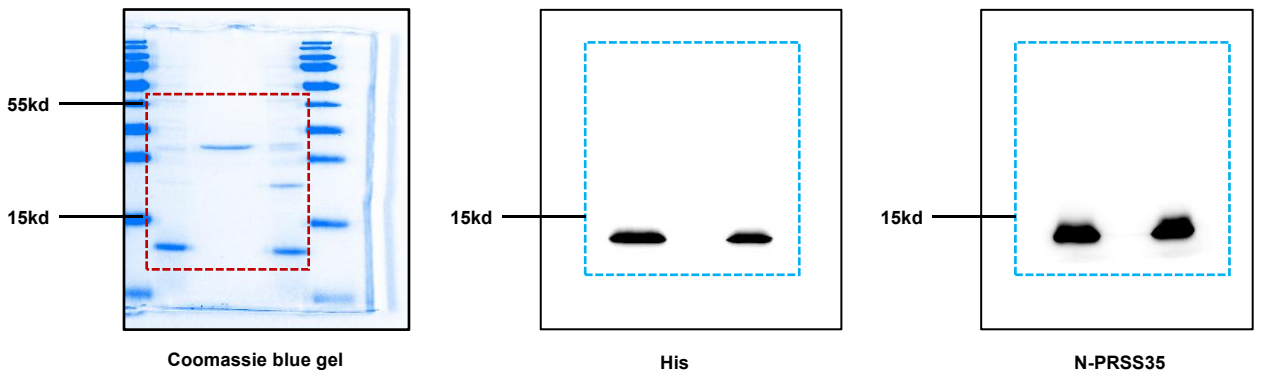

**f**

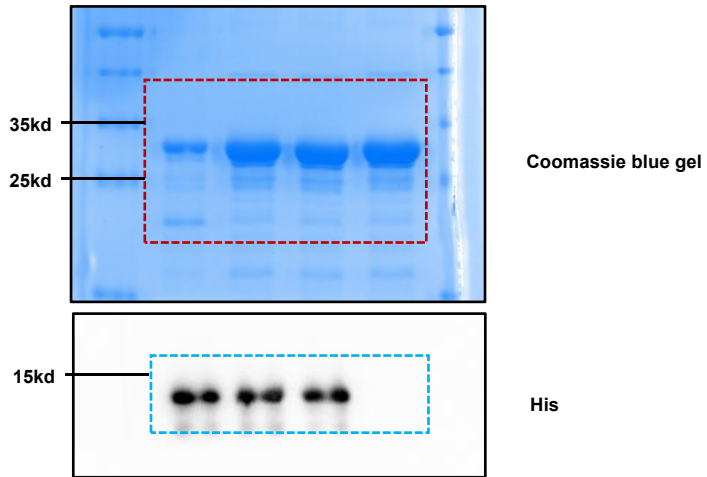

**g**

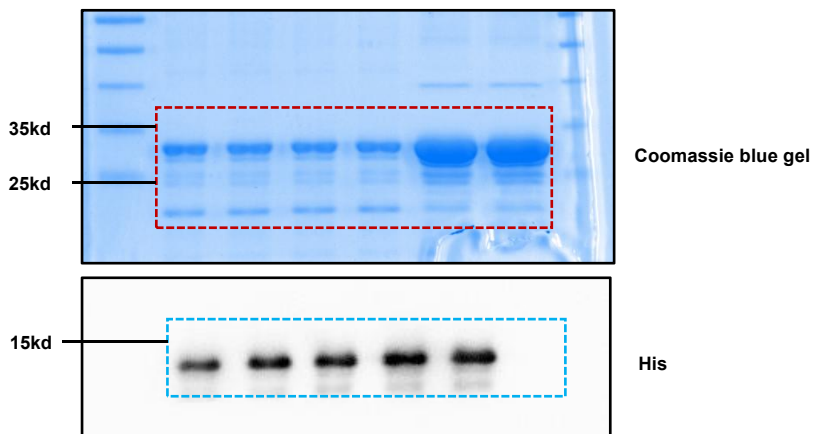

### Source data-Supplementary Figure 3

**d**

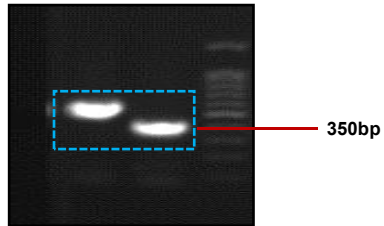

# Source data-Supplementary Figure 4

**d**

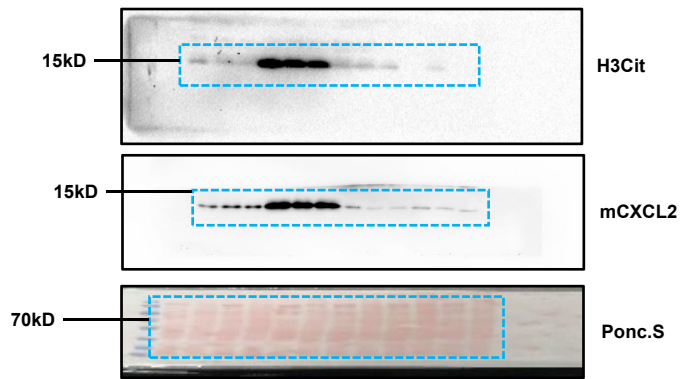

**k**

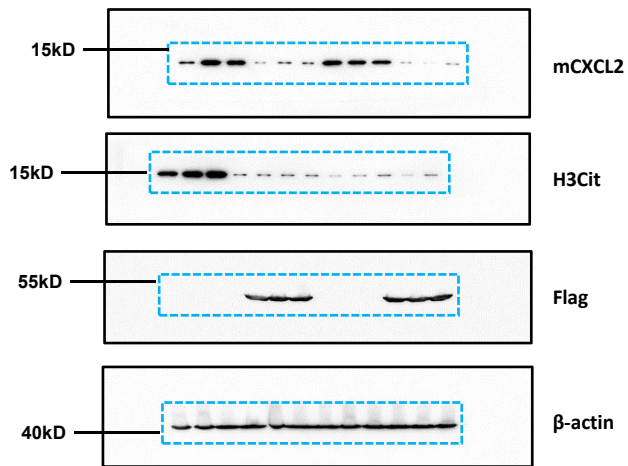

Supplement: 41467_2023_37227_MOESM1_ESM.pdf [file 41467_2023_37227_MOESM1_ESM.pdf]
