# Supplementary material for: Secreted protease PRSS35 suppresses hepatocellular carcinoma by disabling CXCL2-mediated neutrophil extracellular traps
Source: PubMed Central journal article supplement (PMC10024721; doi:10.1038/s41467-023-37227-z), 2023-03-18
Supplement: 41467_2023_37227_MOESM3_ESM.pdf [file 41467_2023_37227_MOESM3_ESM.pdf]

## **Description of Additional Supplementary Files**

File Name: Supplementary Data 1

Description: Cleavage windows (New-born peptide terminals) produced by PRSS35 in 22 potential substrates.

File Name: Supplementary Data 2

Description: The detailed mass spectrum (MS) information of label-free proteomic analysis of the secreted protein profiles of human PLC liver cancer cells and human THLE3 hepatocytes.

File Name: Supplementary Data 3

Description: Mass spectrometry (MS) information of the small molecular bands detected by SDS-PAGE in Fig. 1d.
